# Supplementary material for: Absolute content determination by quantitative NMR (qNMR) spectroscopy: a curious case of aldosterone
Source: Royal Society of Chemistry journal article supplement (doi:10.1039/d1ra03472c), 2021-01-01
Supplement: d1ra03472c1.pdf [file d1ra03472c1.pdf]

## Absolute Content Determination by Quantitative NMR (qNMR) Spectroscopy: A Curious Case of Aldosterone

Neeraj Singh,\* Judith Taibon, Stephan Pongratz and Christian Geletneky\*

Roche Diagnostics, Nonnenwald 2, 82377 Penzberg, Germany

Email: [neeraj.singh.ns1@roche.com](mailto:neeraj.singh.ns1@roche.com), [christian.geletneky@roche.com](mailto:christian.geletneky@roche.com)

### Table of Index

|                                                                                                            |   |
|------------------------------------------------------------------------------------------------------------|---|
| [1] Calculation of Absolute Content of Aldosterone S1 and S2: .....                                        | 1 |
| [2] 1D and 2D-NMR spectra of S1 and S2 Aldosterone utilized for quantification and analyses purpose: ..... | 2 |

#### [1] Calculation of Absolute Content of Aldosterone S1 and S2:

The following formula was utilized to calculate the absolute content of Aldosterone (from commercial source S1 and S2):

$$Px = \frac{Ix * Nstd * Mx * mstd}{Istd * Nx * Mstdmx} * Pstd$$

$Px$  : Purity of the analyte (Aldosterone) as mass fraction;  $Pstd$  : Purity of the internal qNMR standard as mass fraction;  $Ix$  : Integral of the analyte (Aldosterone);  $Istd$  : Integral of the internal standard;  $Nx$  : No. of analyte (Aldosterone) protons;  $Nstd$  : No. of internal qNMR standard protons;  $Mx$  : Molecular weight of the analyte (Aldosterone);  $Mstd$  : Molecular weight of the qNMR internal standard;  $mx$  : Mass of analyte (Aldosterone);  $mstd$  : Mass of qNMR internal standard

The following values are common to all the qHNMR measurements:

Molecular Weight of Aldosterone = 360.444 g/mol; Molecular weight of the qNMR internal standard ISTD (Tecnazene = 260.890 g/mol; Purity of the qNMR internal standard as mass fraction = 99.82%; Number of Protons taken into account, for both the ISTD and Aldosterone = 1 each; Integral of Aldosterone proton = 1 (alkene proton).

**Table 1** : qNMR calculation of the absolute content of S1 and S2 Aldosterone, with aldosterone quantification signal set to an integral area value of 1.

| Aldosterone source | Measurement No. | Mass of Aldosterone weighed (mx) | Mass of qNMR ISTD weighed (mstd) | Integral of the qNMR ISTD (Istd) | Absolute Content of Aldosterone (Px) % |
|--------------------|-----------------|----------------------------------|----------------------------------|----------------------------------|----------------------------------------|
| S1                 | 1               | 3.9088                           | 1.9430                           | 0.7301                           | 93.91                                  |
| S1                 | 2               | 4.8432                           | 2.5879                           | 0.7876                           | 93.56                                  |
| S1                 | 3               | 2.5978                           | 1.3418                           | 0.7584                           | 93.93                                  |
| S2                 | 4               | 1.7510                           | 1.6436                           | 1.5816                           | 81.85                                  |

[2] 1D and 2D-NMR spectra of S1 and S2 Aldosterone utilized for quantification and analyses purpose:

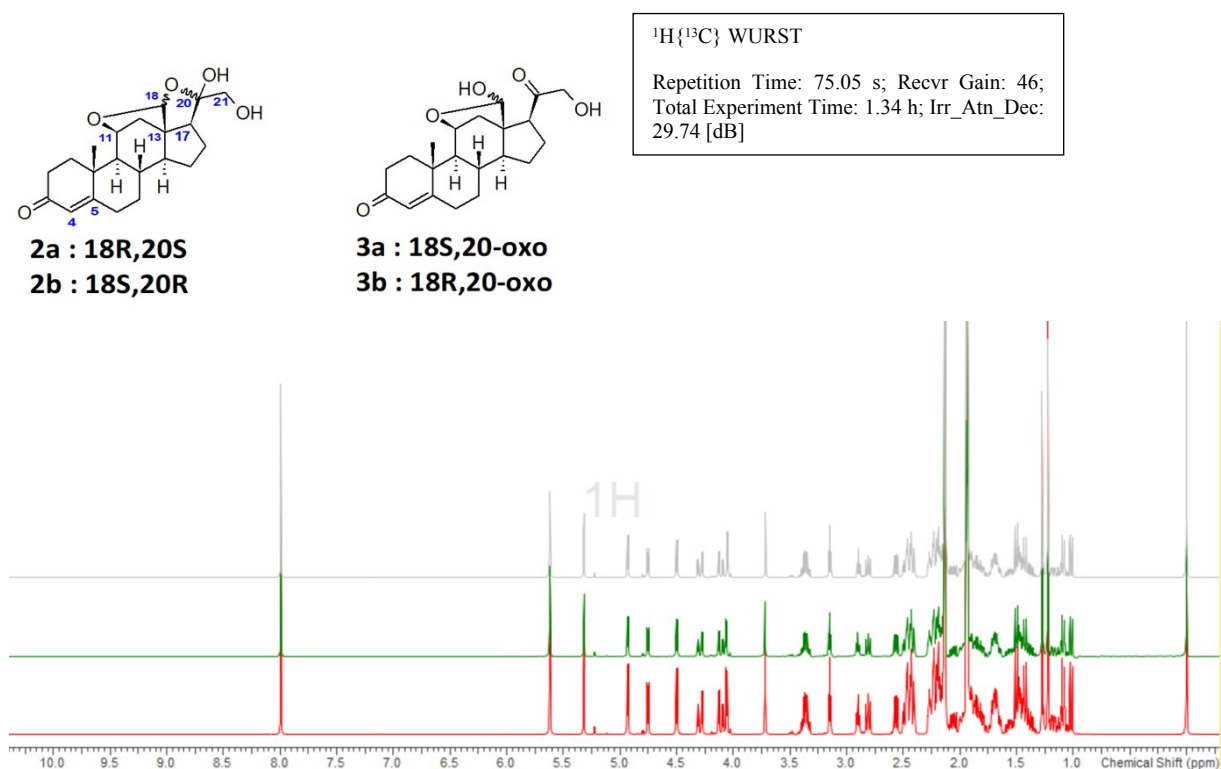

**Figure 1.** Overlay of the  $^1\text{H}$ NMR spectra for Aldosterone S1

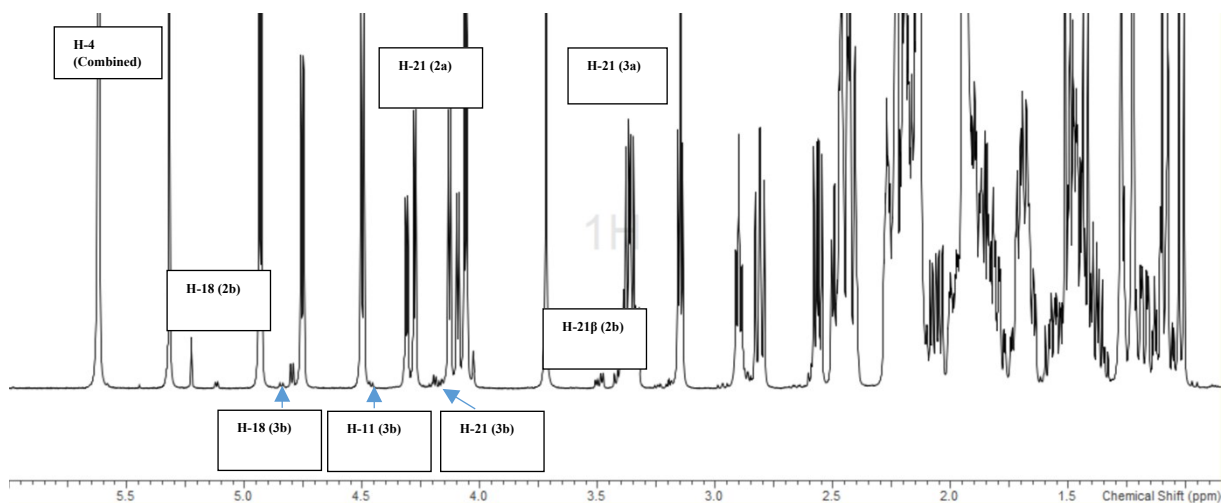

**Figure 2.** Expansion of the  $^1\text{H}$ NMR spectrum of Aldosterone S1 (Experiment 1).

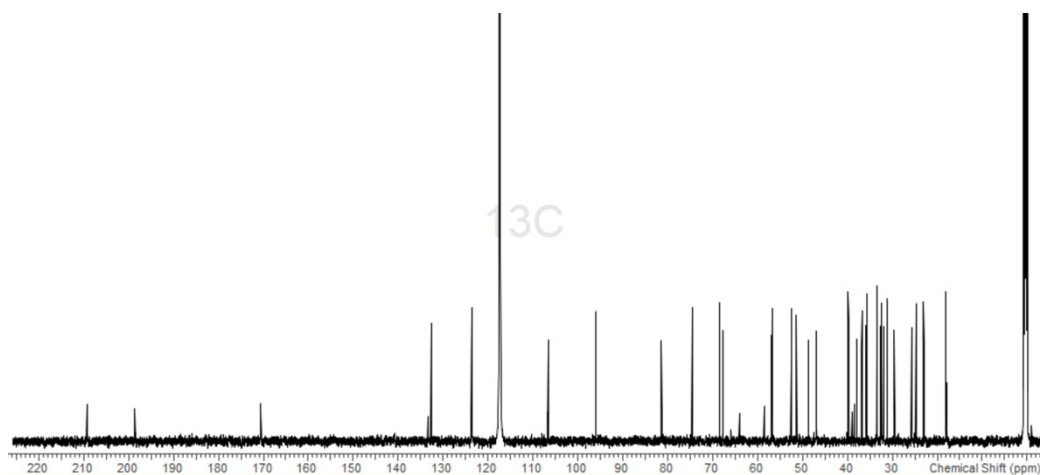

**Figure 3.**  $^{13}\text{C}$ NMR of Aldosterone 1 (Experiment 1)

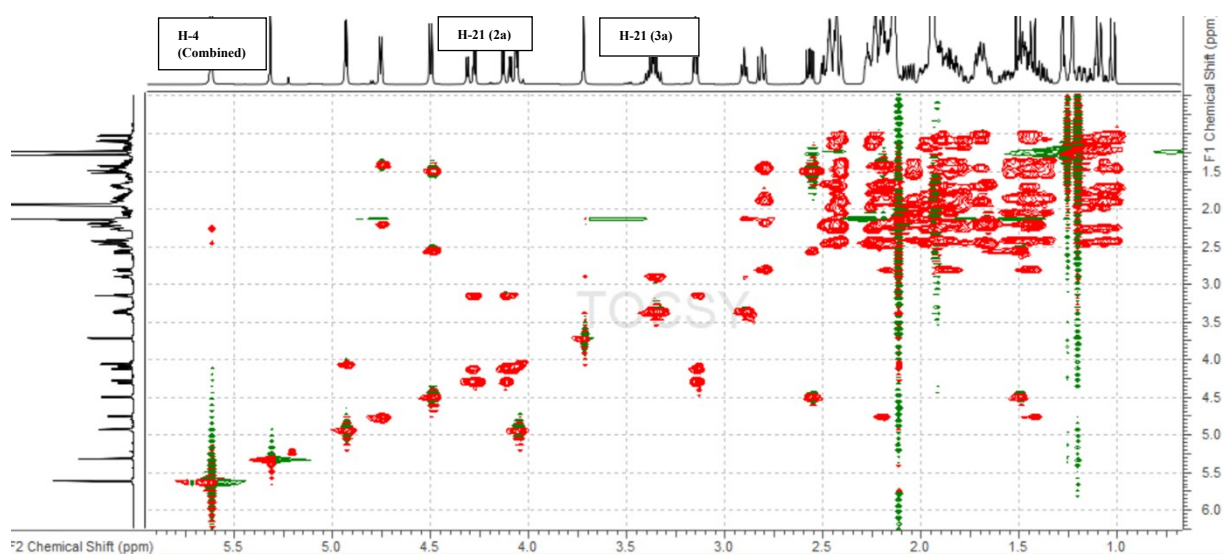

**Figure 4.** 2D-TOCSY spectrum of Aldosterone S1 (Experiment 1)

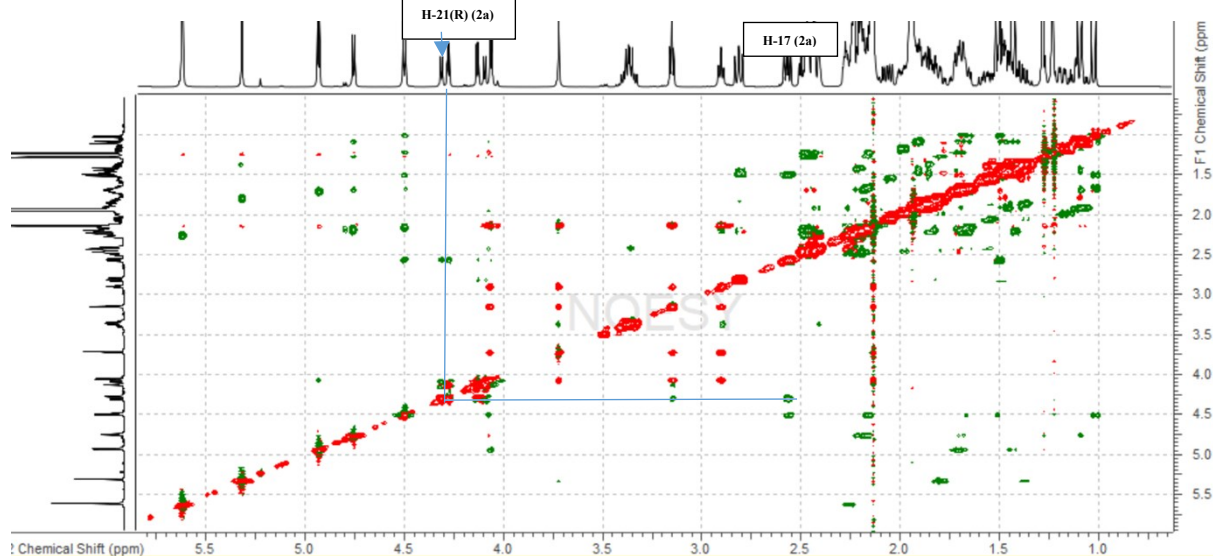

**Figure 5.** 2D-NOESY of Aldosterone S1 (Experiment 1).

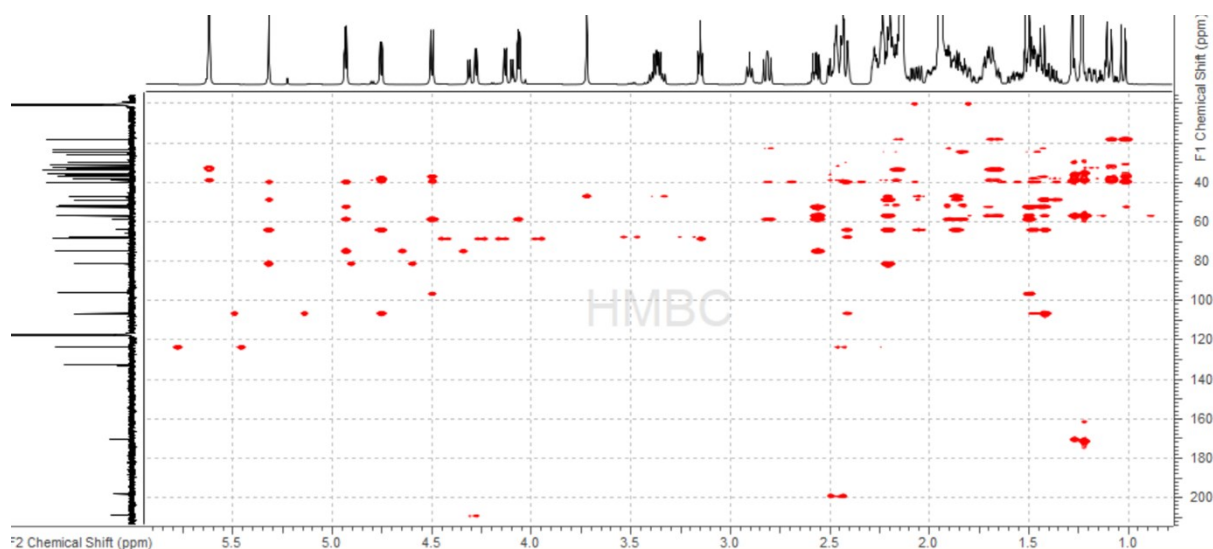

**Figure 6.** 2D-gHMBCAD (optimized for 3 Hz) of Aldosterone S1 (Experiment 1).

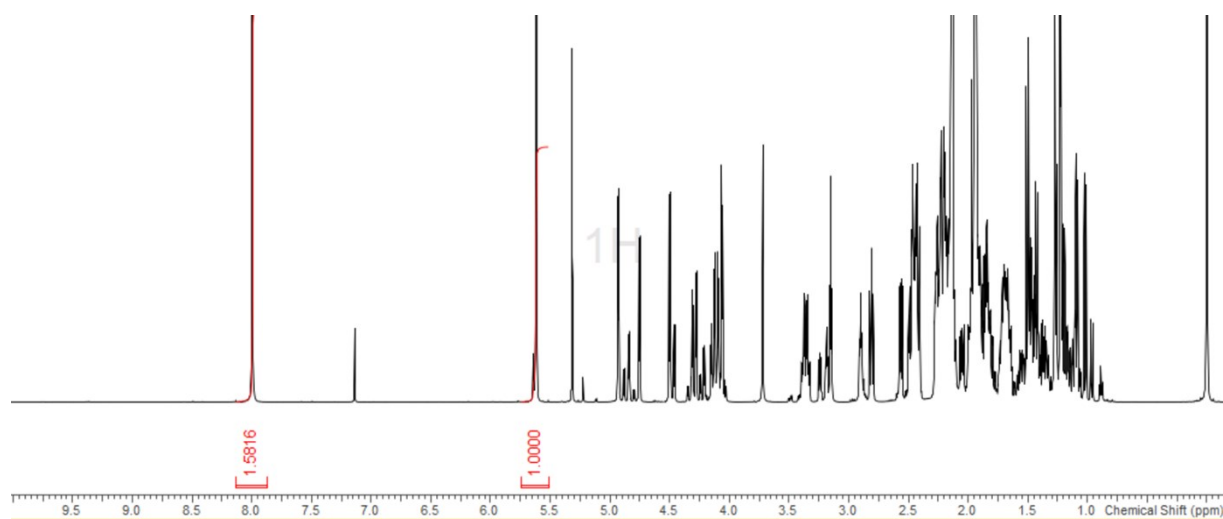

**Figure 7.**  $^1\text{H}$ NMR spectrum of Aldosterone S2, including qNMR internal standard

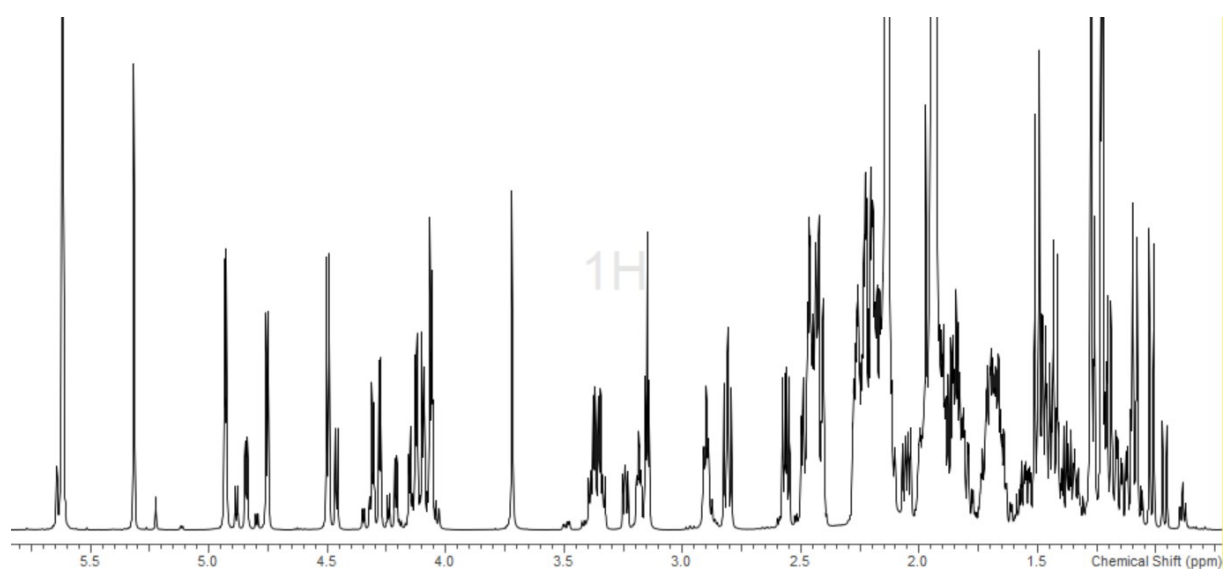

**Figure 8.** Expansion of the  $^1\text{H}$ NMR spectrum of Aldosterone S2.

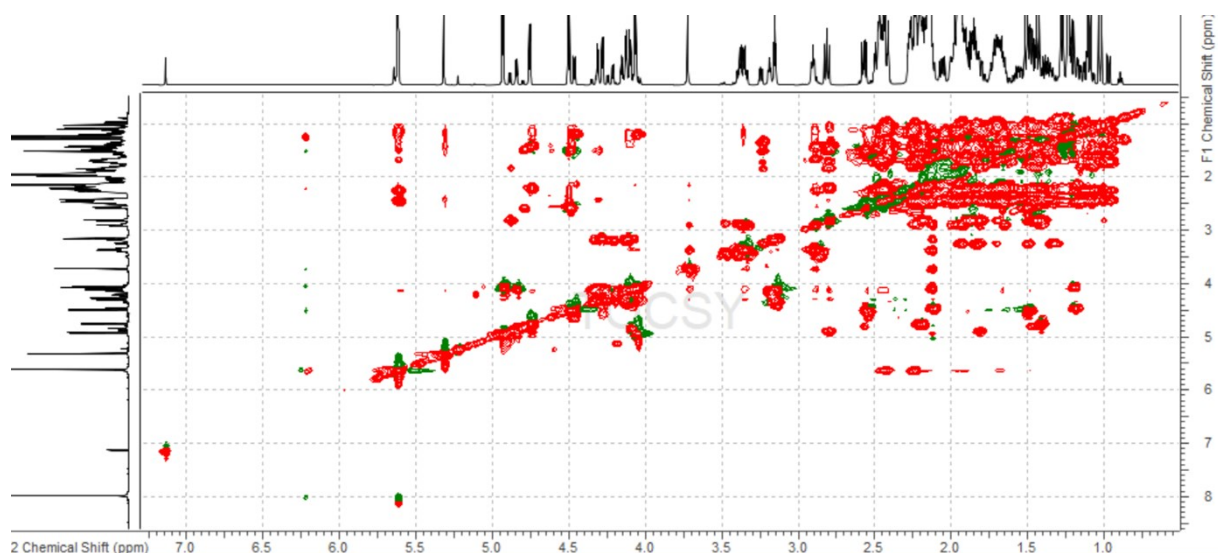

**Figure 9.** 2D-TOCSY of Aldosterone S2.

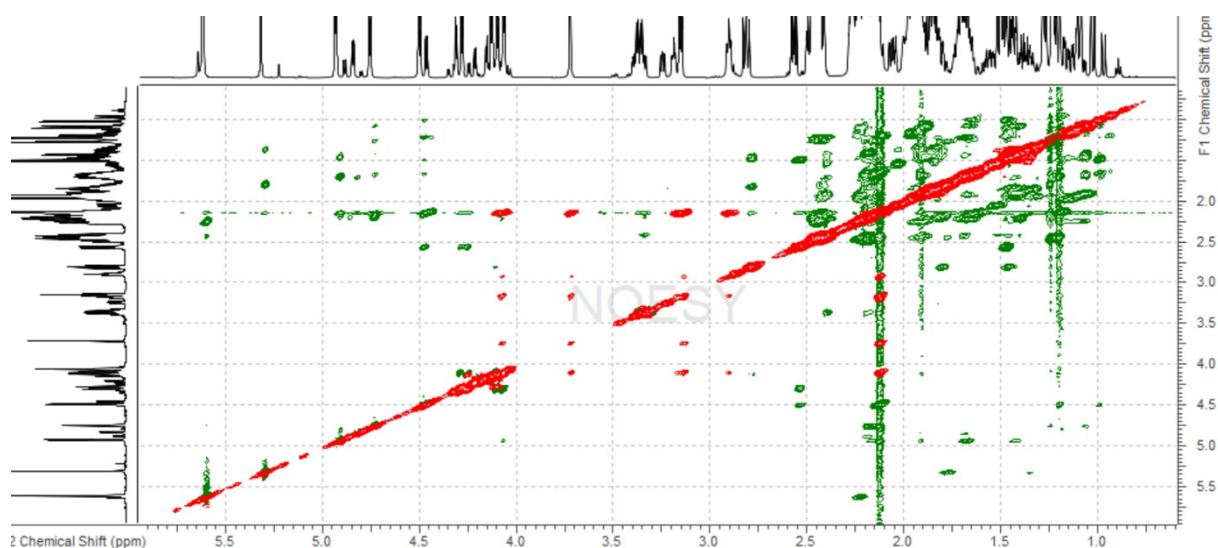

**Figure 10.** 2D-NOESY spectrum of Aldosterone S2.

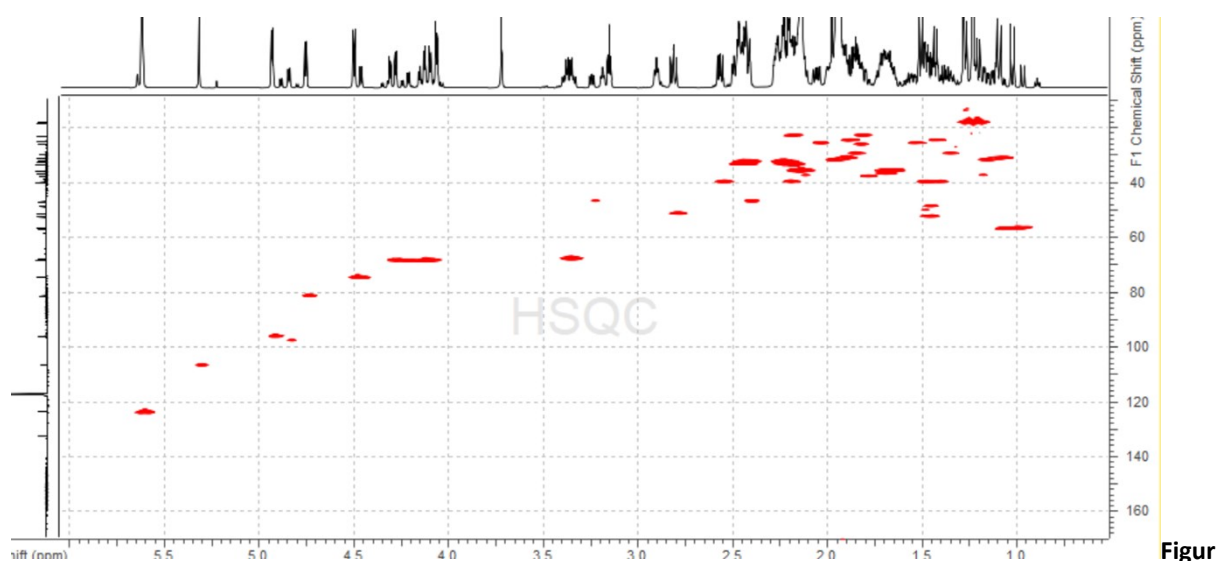

**e 11.** 2D-HSQC of Aldosterone S2.

**Figure**
